# Supplementary material for: The soil organic carbon stabilization potential of old and new wheat cultivars: a 13 CO 2 -labeling study
Source: Copernicus journal article supplement (doi:10.5194/bg-17-2971-2020), 2020-06-11
Supplement: Supplementary file 1 [file bg-17-2971-2020-supplement.zip]

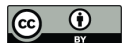

## *Supplement of*

# **The soil organic carbon stabilization potential of old and new wheat cultivars: a $^{13}\text{CO}_2$ -labeling study**

**Marijn Van de Broek et al.**

*Correspondence to:* Marijn Van de Broek ([marijn.vandebroek@usys.ethz.ch](mailto:marijn.vandebroek@usys.ethz.ch))

- [bg-17-2971-2020-supplement-title-page.pdf](#)
- [Supplementary figures and tables.pdf](#)
- [Van de Broek et al., Supplementary data\\_final submission.xlsx](#)

The copyright of individual parts of the supplement might differ from the CC BY 4.0 License.
