# Supplementary material for: The soil organic carbon stabilization potential of old and new wheat cultivars: a 13 CO 2 -labeling study
Source: Copernicus journal article supplement (doi:10.5194/bg-17-2971-2020), 2020-06-11
Supplement: Supplementary file 1 [file Van de Broek et al., Supplementary data_final submission.xlsx]

## Sheet: Biomass weights
This file contains data from Van de Broek et al. 2020, Biogeosciences,
The soil organic carbon stabilization potential of old and new wheat cultivars: a 13CO2 labelling study
Corresponding author: Marijn Van de Broek, Marijn.vandebroek@usys.ethz.ch
Aboveground biomass (g/m2)
		Ears	Stems	Leaves	Total
CH Claro	Rep 1	33.1769	388.923	298.557	720.657
	Rep 2	96.5795	534.576	406.342	1037.5
	Rep 3	147.936	703.688	584.33	1435.95
Zinal	Rep 1	275.951	236.872	143.532	656.355
	Rep 2	255.374	174.392	114.932	544.698
	Rep 3	469.271	313.877	147.44	930.589
Probus	Rep 1	2.85888	314.166	412.278	729.303
	Rep 2	16.8651	677.463	576.952	1271.28
	Rep 3	42.8025	741.845	679.03	1463.68
Mont-Calme 268	Rep 1	3.49291	434.227	494.817	932.537
	Rep 2	6.49012	417.051	534.818	958.359
	Rep 3	27.8165	708.242	730.444	1466.5
Belowground biomass (g/m2)
CH Claro	Rep1	Rep2	Rep3
7.5	43.6636	127.986	80.316
30	12.4268	14.2942	4.29506
60	1.85044	4.63459	2.49555
90	4.14227	5.19482	3.78577
120	4.94017	9.28616	3.51414
Zinal	Rep1	Rep2	Rep3
7.5	55.1737	68.3305	122.588
30	5.63621	5.38156	6.16248
60	1.52789	0.645108	1.78254
90	5.8569	1.42603	2.4616
120	5.02505	4.7025	3.66693
Probus	Rep1	Rep2	Rep3
7.5	43.0864	191.971	152.178
30	6.40015	26.6701	17.7235
60	2.47857	6.11155	3.8367
90	1.62975	9.65964	3.20856
120	5.36458	8.77686	4.7025
Monte Clame	Rep1	Rep2	Rep3
7.5	66.0557	301.062	145.93
30	14.8205	14.7526	27.4001
60	4.37994	2.173	8.33547
90	4.71947	2.95392	6.75666
120	3.08973	3.1067	8.75989

## Sheet: Biomass d13C
This file contains data from Van de Broek et al. 2020, Biogeosciences,
The soil organic carbon stabilization potential of old and new wheat cultivars: a 13CO2 labelling study
Corresponding author: Marijn Van de Broek, Marijn.vandebroek@usys.ethz.ch
Aboveground biomass d13C (per mil)
	Rep1	Rep2	Rep3
CH Claro	212.623	178.56	322.375
Zinal	339.328	284.01	218.678
Probus	371.473	152.898	257.514
Mont Calme 268	351.874	297.833	214.399
Belowground biomass d13C (per mil)
CH Claro	Rep1	Rep2	Rep3
7.5	133.065	75.186	220.213
30	172.451	102.548	220.842
60	Missing	92.187	-24.528
90	205.317	33.7767	-28.069
120	57.2386	27.7717	-17.8223
Zinal	Rep1	Rep2	Rep3
7.5	173.135	119.04	93.859
30	189.481	209.193	95.653
60	Missing	Missing	-9.50925
90	28.0456	105.427	-22.8593
120	-25.9114	-6.88525	Missing
Probus	Rep1	Rep2	Rep3
7.5	214.564	180.699	199.606
30	221.421	201.58	220.67
60	249.917	170.884	224.209
90	Missing	164.856	199.951
120	31.2196	163.512	188.714
Monte Clame	Rep1	Rep2	Rep3
7.5	228.745	229.879	89.522
30	191.467	235.21	158.134
60	185.237	149.945	137.605
90	143.851	180.125	156.157
120	239.629	249.055	150.435

## Sheet: Depth profiles
This file contains data from Van de Broek et al. 2020, Biogeosciences,
The soil organic carbon stabilization potential of old and new wheat cultivars: a 13CO2 labelling study
Corresponding author: Marijn Van de Broek, Marijn.vandebroek@usys.ethz.ch
SOC %
CH Claro					Zinal					Probus					Mont-Calme 268					Initial soil
Depth	Rep 1	Rep 2	Rep3		Depth	Rep 1	Rep 2	Rep3		Depth	Rep 1	Rep 2	Rep3		Depth	Rep 1	Rep 2	Rep3		Depth
0.075	0.58697	0.715704	0.621662		0.075	0.755809	0.706172	0.653165		0.075	0.773044	0.658109	0.768484		0.075	0.754391	0.533694	0.583321		0.075	0.773123
0.3	0.373953	0.367688	0.373358		0.3	0.45114	0.381602	0.370685		0.3	0.396941	0.418704	0.418328		0.3	0.436003	0.413114	0.483865		0.3	0.397551
0.6	0.398842	0.391551	0.367395		0.6	0.397398	0.405768	0.401419		0.6	0.432546	0.39301	0.35222		0.6	0.359649	0.429979	0.409373		0.6	0.397551
0.9	0.412079	0.395107	0.399124		0.9	0.420674	0.405796	0.383506		0.9	0.436056	0.42248	0.432355		0.9	0.446074	0.388436	0.386865		0.9	0.397551
1.2	0.432485	0.389832			1.2	0.396291	0.393096	0.400107		1.2	0.411565	0.411175	0.400082		1.2	0.392175	0.415425			1.2	0.397551
d13C of SOC
CH Claro					Zinal					Probus					Mont-Calme 268					Initial soil
Depth	Rep 1	Rep 2	Rep3		Depth	Rep 1	Rep 2	Rep3		Depth	Rep 1	Rep 2	Rep3		Depth	Rep 1	Rep 2	Rep3		Depth
0.075	-21.0057	-20.712	-20.46		0.075	-23.9967	-23.3398	-22.3248		0.075	-22.8097	-6.826	-19.5127		0.075	-22.8758	-17.711	-17.9028		0.075	-26.4472
0.3	-22.5797	-21.206	-22.942		0.3	-23.1767	-23.3598	-22.9788		0.3	-22.7297	-21.63	-20.9417		0.3	-23.8358	-22.944	-21.1898		0.3	-25.0084
0.6	-23.7647	-24.152	-24.381		0.6	-23.4547	-24.1158	-23.4718		0.6	-22.8927	-24.434	-22.8037		0.6	-24.367	-23.535	-23.6428		0.6	-25.0084
0.9	-24.2357	-23.587	-24.382		0.9	-24.3987	-22.3048	-24.3808		0.9	-24.3947	-22.828	-24.2367		0.9	-24.347	-23.555			0.9	-25.0084
1.2	-24.8827	-24.218			1.2	-24.1467	-24.0758	-24.4448		1.2	-24.1647	-23.958	-23.9197		1.2	-24.237	-23.897	-23.6338		1.2	-25.0084
d13C of microbial biomass
CH Claro					Zinal					Probus					Mont-Calme 268
Depth	Rep 1	Rep 2	Rep3		Depth	Rep 1	Rep 2	Rep3		Depth	Rep 1	Rep 2	Rep3		Depth	Rep 1	Rep 2	Rep3
0.075	-6.60777	-7.46322	-4.23346		0.075	-6.75353	-2.41925	-7.09201		0.075	-10.9511	1.13686	5.0806		0.075	4.9539	-14.9032	3.27818
0.3	-19.7142	-16.0067	-19.4876		0.3	-23.6701	-19.8756	-21.8402		0.3	-17.4211	-17.6079	-15.5447		0.3	-14.316	-15.076	-18.6995
0.6	-21.5986	-20.6978	-24.5293		0.6	-19.4024	-21.9516	-21.8286		0.6	-22.6947	-23.5978	-18.4309		0.6	-19.9474	-23.8668	-23.8556
0.9	-22.7638	-22.5267	-23.7416		0.9	-22.2912	-24.9182	-24.1116		0.9	-18.0135	-19.7189	-23.5954		0.9	-21.6163	-21.1361	-24.2093
1.2	-21.6046	-23.9048	-21.8702		1.2	-23.9907	-28.1874	-22.6734		1.2	-22.8553	-23.5322	-23.7458		1.2	-22.4739	-21.4583	-23.0748
d13C of CO2
CH Claro					Zinal					Probus					Mont-Calme 268
Depth	Rep 1	Rep 2	Rep3		Depth	Rep 1	Rep 2	Rep3		Depth	Rep 1	Rep 2	Rep3		Depth	Rep 1	Rep 2	Rep3
0.075	28.2869	1.8979	14.1009		0.075	19.2019	15.4939	-4.4771		0.075	13.9029	1.3609	14.1439		0.075	20.4149	19.3009	1.6569
0.3	123.114	107.259	80.4409		0.3	138.018	91.2939	100.111		0.3	117.896	131.835	115.954		0.3	114.25	115.603	101.661
0.6	49.3539	79.7809	73.9949		0.6	82.5339	42.7569	67.2159		0.6	62.6769	95.3939	88.6589		0.6	89.3979	106.489	96.4809
0.9	30.0739	60.4729	66.3689		0.9	67.8639	39.5349	50.0509		0.9	53.4979	83.9809	84.3999		0.9	85.1899	96.2989	92.0529
1.2	39.4429	48.8759	62.2029		1.2	59.5299	34.2359	43.7049		1.2	51.1839	80.0949	83.5469		1.2	82.2839	92.3989	93.1959

## Sheet: Excess 13C
This file contains data from Van de Broek et al. 2020, Biogeosciences,
The soil organic carbon stabilization potential of old and new wheat cultivars: a 13CO2 labelling study
Corresponding author: Marijn Van de Broek, Marijn.vandebroek@usys.ethz.ch
Claro	Excess 13C (g 13C/m2)	StdError
Aboveground biomass	1.3023	0.0640518
Belowground biomass	0.163387	0.0357968
Soil	0.178369	0.021081
Zinal	Excess 13C (g 13C/m2)	StdError
Aboveground biomass	1.01135	0.105772
Belowground biomass	0.0619	0.00513064
Soil	0.116002	0.00721777
Probus	Excess 13C (g 13C/m2)	StdError
Aboveground biomass	1.57488	0.177021
Belowground biomass	0.149	0.0484941
Soil	0.2876	0.0809712
Monte Calme	Excess 13C (g 13C/m2)	StdError
Aboveground biomass	1.64616	0.09448
Belowground biomass	0.224	0.0876684
Soil	0.178039	0.0441809
Data rhizodeposition C
Depth	Claro	Zinal	Probus	Monte Calme	Claro StdError	Zinal StdError	Probus StdError	Monte Calme StdError
7.5	66.284	39.0982	77.0082	58.5442	20.1584	9.46501	33.3251	27.1642
30	31.1033	23.1327	30.6879	24.6582	12.8591	5.63411	4.28251	10.4301
Root C
Depth	CH Claro	Zinal	Probus	Monte Clame	CH Claro std error	Zinal std error	Probus std error	Monte Clame std error
7.5	29.6186	32.5777	49.7634	63.7873	8.93723	8.22051	17.1624	25.8563
30	4.07657	2.45288	6.55278	7.25715	1.21501	0.130792	2.28753	1.61077

## Sheet: CO2 concentration
This file contains data from Van de Broek et al. 2020, Biogeosciences,
The soil organic carbon stabilization potential of old and new wheat cultivars: a 13CO2 labelling study
Corresponding author: Marijn Van de Broek, Marijn.vandebroek@usys.ethz.ch
CO2 concentration depth profiles
Zinal	2015-09-02	2015-09-08	2015-09-16	2015-09-23	2015-09-30	2015-10-07	2015-10-14	2015-10-21	2015-10-28	2015-11-04	2015-11-11	2015-11-18	2015-11-25	2015-12-02	2015-12-09	2015-12-16	2015-12-22	2015-12-29	2016-01-06	2016-01-12	2016-01-19
0.075	737.19	954.295	330.329	286.123	373.734	485.451	408.275	417.044	405.497	451.441	461.926	574.834	472.433	6496.77	452.701	444.967	410.828	439.815	469.188	457.848	455.954
0.3	2395.55	2360.86	1641.97	1861.03	2282.58	2122.54	2526.95	2217.84	2266.95	2363.91	2581.15	2926.55	3053.99	3485.28	4112.6	3910.38	3925.7	2402.98	5755.91	3818.03	3497.17
0.6	5709.65	8676.45	7326.2	6910.49	15088.8	11822.3	16827.3	14354.5	14703.7	15792.7	16631.5	19563.6	15488.6	16022.2	15722.8	14879.4	13194.3	14387.4	16129.2	15721.2	14153.2
0.9	5128.27	8918.9	7350.23	9780.52	15379.7	14233	19852.4	16156.9	18055.4	17923.3	19458.9	23096.6	18554.9	11856.1	19280.3	18620.6	17135.5	17391.2	19530.1	18078	16931.8
1.2	5361.78	8729.49	6742.4	9264.16	16795.7	14085.5	20476.3	16978	18510.3	19631.2	20904.9	24108.5	18640.4	20099.4	18352.8	18877.2	17906.8	17786.5	18934.8	18960.6	17350.8
CH Claro
0.075	757.048	934.824	730.826	476.248	498.981	593.917	526.984	543.025	539.901	486.396	606.132	727.129	549.428	505.998	536.357	587.22	446.084	448.7	489.473	498.908	501.468
0.3	3175.77	5479.27	3344.57	3003.88	3558.5	4465.49	5932.16	5076.12	4525.15	4189.55	4106.01	5548.66	4589.42	5808.5	6752.33	6010.59	6005.94	5901.63	7287.18	7025.31	5926.18
0.6	4559.64	7684.4	5698.45	7332.94	10445.3	10442.1	14802.3	11518.8	10573.1	11017.3	12268	13443	10817.6	11698.7	12057.3	11445.4	11696.3	11543.8	13413.2	12735.8	10849.3
0.9	5308.43	7652.81	6355.57	8279.89	13370	11180.4	15626.3	13020.8	13960.8	13958	15691.8	16738	12747.9	14008.4	13134.3	13448.2	13169.3	12948	15009.2	14617	12976.1
1.2	5212.47	7739.08	6811.24	9200.19	14633.1	12193.6	16842.2	14113.6	14601.4	15485.6	17658.9	18718.7	15046.4	15044.9	15011.9	13564.7	14398	14459.5	17073.6	15681.1	14167.4
Probus
0.075	660.142	557.784	817.765	353.537	468.944	553.975	358.156	428.732	419.875	465.401	482.537	503.669	302.269	363.105	453.506	461.014	396.497	463.405	415.123	500.145	464.535
0.3	2260.67	3877.1	1395.3	2032.48	2393.74	2763.65	2473.03	2621.63	2921.21	3480.72	3873.28	4198.16	3544.48	5280.31	5624.38	5922.38	5356.35	5274.33	6185.19	6300.32	4841.9
0.6	5049.57	7526.4	6815.78	5922.55	15719.1	13171.2	18979.3	15509.1	16668.3	16579	19122.7	22127.6	16878.5	18810.4	17447	18089.5	18264.1	16488.9	15076.4	17725.7	16636.5
0.9	5438.2	7679.24	7483.22	9378.1	18044.9	15448	23472.6	19409.2	20837.6	22330.6	21856.6	27733.1	23245.8	22678.5	23968.5	23331.8	23341.2	21946.9	22823.9	23415.2	18985.5
1.2	5724.3	8816.41	6406.68	9649.53	17403.4	16360.2	24759.5	21372.4	21750.2	24277.8	28447.6	30561.7	25889.8	25170.9	28225.6	26551.1	24611.1	23501.4	28916.7	25283.1	23718.9
Mont-Calme 268
0.075	2641.34	1632.8	494.055	457.265	416.674	531.942	474.904	451.18	437.314	451.07	434.716	532.471	478.385	427.099	433.868	482.793	421.385	582.188	531.373	514.731	513.952
0.3	3626.85	4037.93	3186.15	2449.29	5114.43	4862.57	6085.09	4634.06	4617.65	5177.2	4812.33	6595.33	6020.49	6192.35	5440.02	6279.99	6547.44	5894.93	6889.83	6366.92	5220.26
0.6	4770.29	10317.9	7283.4	10220	19148.8	10086.8	20341.9	16119.5	17165.6	18107.1	20556.5	22774.6	18667.5	19391	18852.6	18551.6	17827.9	18492.6	18813.9	18959.3	16801.2
0.9	7137.46	10957.9	8082.38	12135.7	20633	16861.4	24433.4	20546.6	20067.9	21427.7	26304.7	29581.6	24434.2	25277.3	25607.3	24918.9	24380.4	24760.5	25785.7	23797.3	21926.7
1.2	6922.09	10891.9	7742.16	12125.4	20224	16542.2	25186.8	20844.2	22428.9	22940.3	27688.3	30923	26619.8	26042.3	24952.5	22258.1	25376.4	26461.1	28695.6	25724.3	23855.2
