# Supplementary material for: The soil organic carbon stabilization potential of old and new wheat cultivars: a 13 CO 2 -labeling study
Source: Copernicus journal article supplement (doi:10.5194/bg-17-2971-2020), 2020-06-11
Supplement: Supplementary file 2 [file bg-17-2971-2020-supplement.zip]

Archive with 3 entries (3 files):
- Supplementary figures and tables.pdf
- Van de Broek et al., Supplementary data_final submission.xlsx
- bg-17-2971-2020-supplement-title-page.pdf
